# Supplementary material for: Fire intensity impacts on post-fire temperate coniferous forest net primary productivity
Source: Copernicus journal article supplement (doi:10.5194/bg-15-1173-2018), 2018-02-27

Supplement of Biogeosciences, 15, 1173–1183, 2018  
<https://doi.org/10.5194/bg-15-1173-2018-supplement>  
© Author(s) 2018. This work is distributed under  
the Creative Commons Attribution 4.0 License.

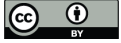

*Supplement of*

## **Fire intensity impacts on post-fire temperate coniferous forest net primary productivity**

**Aaron M. Sparks et al.**

*Correspondence to:* Aaron M. Sparks ([asparks@uidaho.edu](mailto:asparks@uidaho.edu))

The copyright of individual parts of the supplement might differ from the CC BY 4.0 License.

**Supplemental Figure 1.** Fire intensity impacts on net primary productivity. Peak FRP (top row) and mean FRP (bottom row) dose impacts on relative NPP (%) response observed in forests dominated by species varying from fire-resistant to fire-susceptible (first column – third column). Mean relative NPP is grouped by FRP percentile classes and shading represents 95% confidence intervals in all panes. Grey dotted line marks fire year.

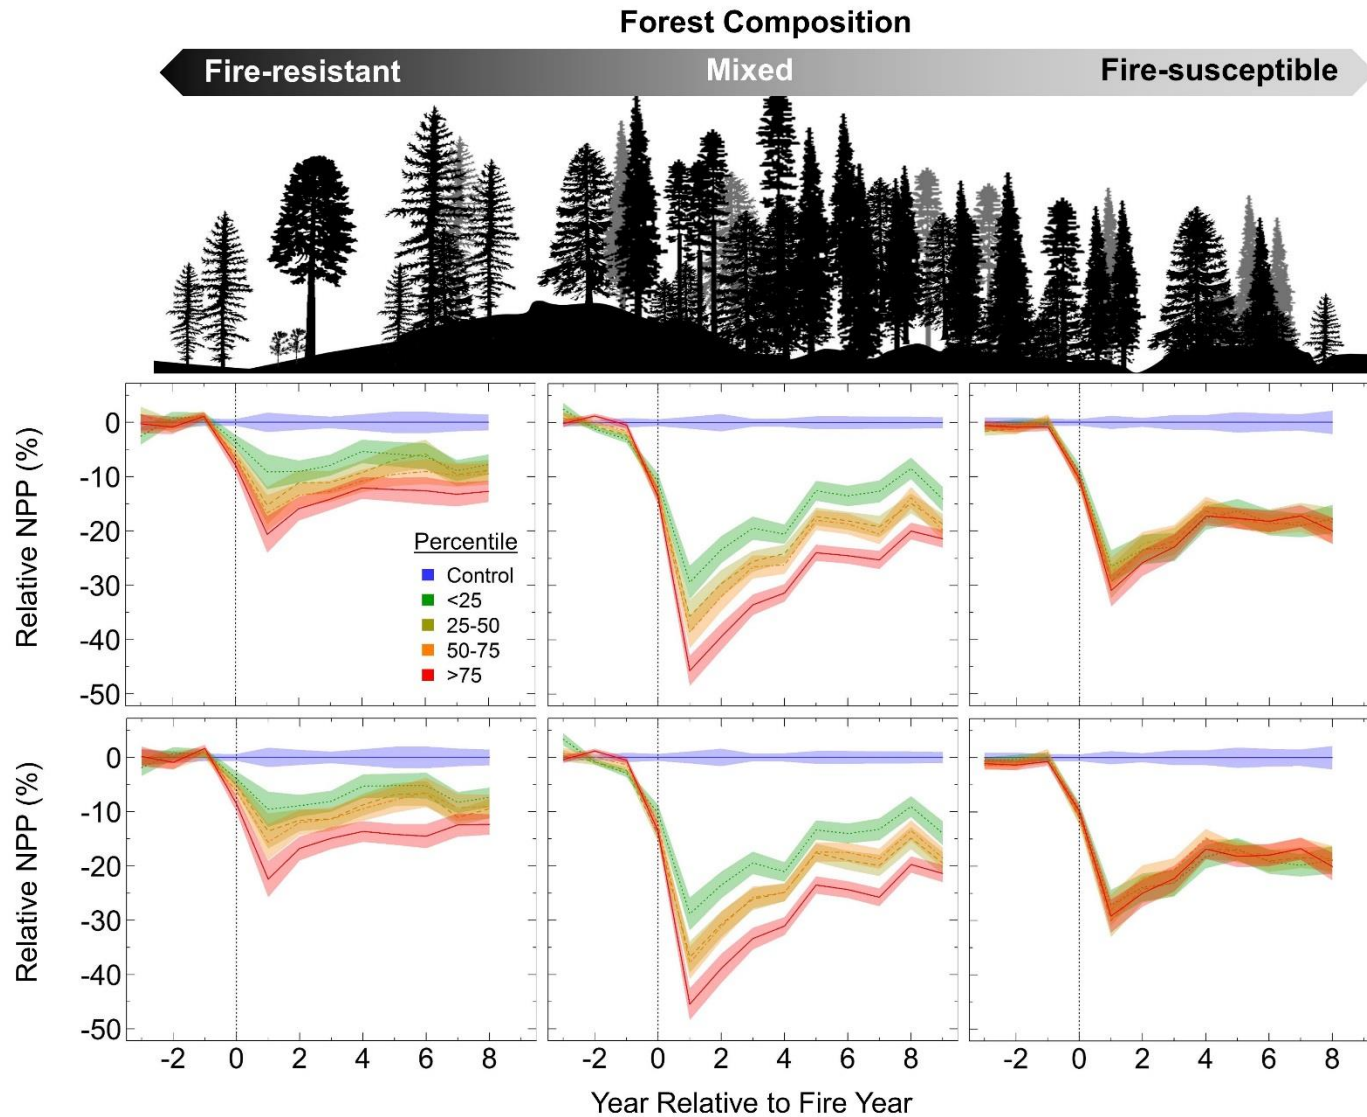

**Supplemental Figure 2.** FIRE dose impacts on NPP response (mean  $\pm$  SE) observed in forest stands dominated with species across the fire resistance continuum. Forests dominated by fire-resistant species (R1-R5), mixed species (M1-M5), and fire-susceptible species (A1-A5) are shown. Grey dotted line marks fire year.

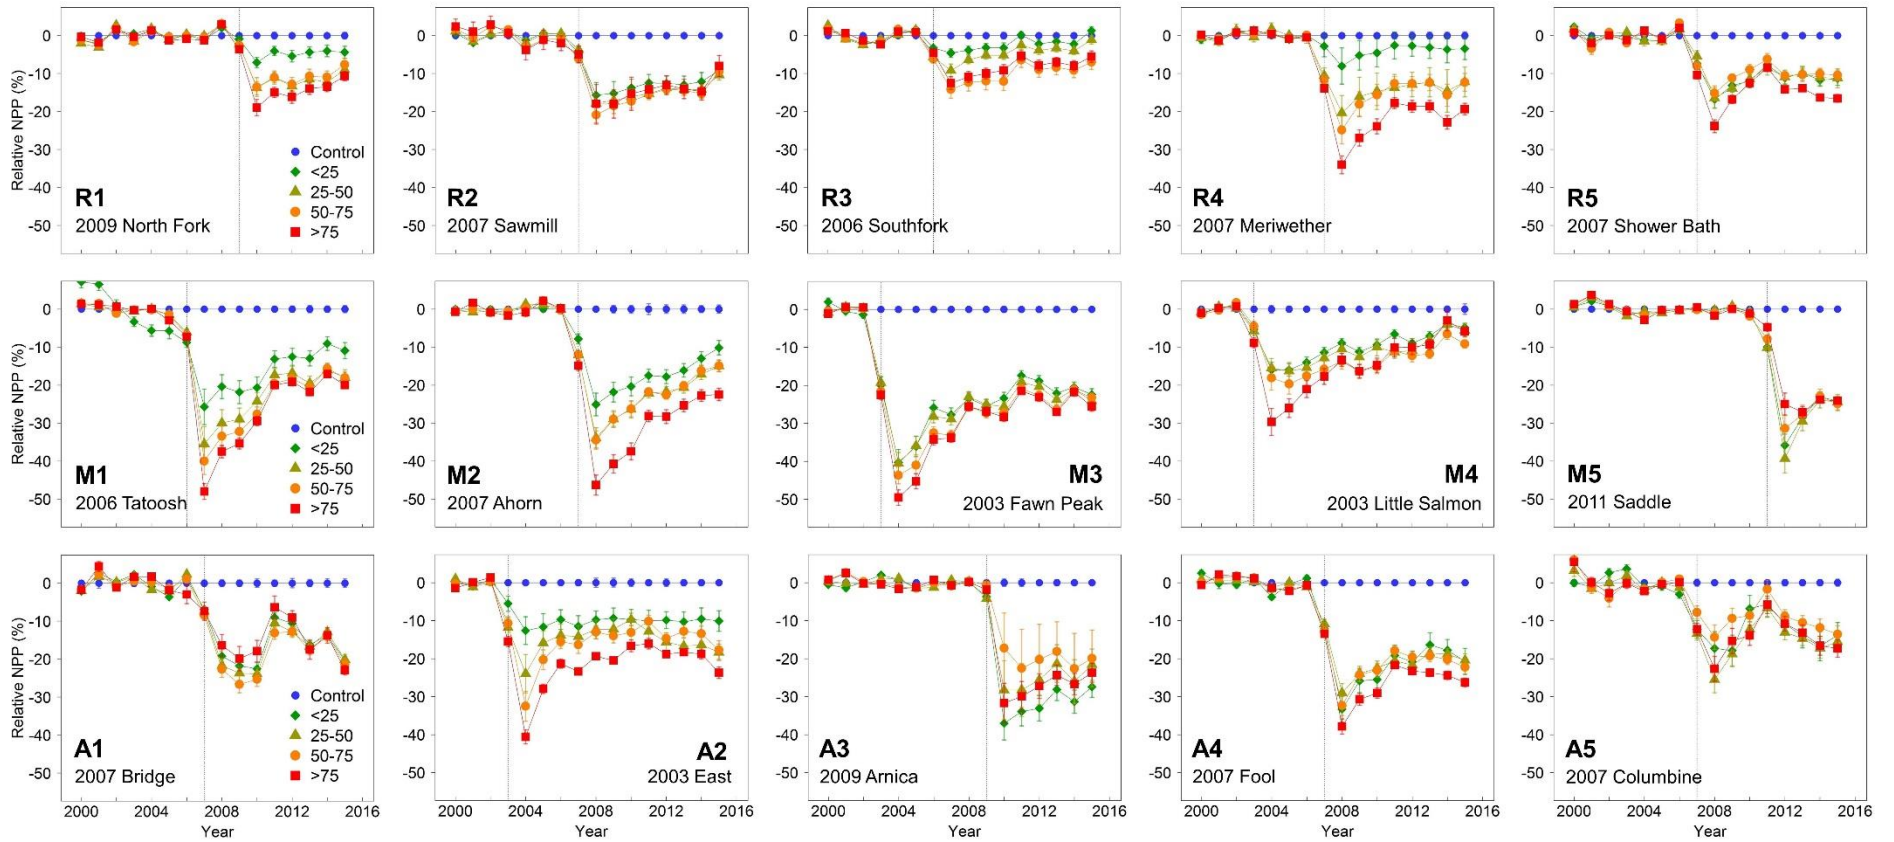

**Supplemental Figure 3.** Peak FRP dose impacts on NPP response (mean  $\pm$  SE) observed in forest stands dominated with species across the fire resistance continuum. Forests dominated by fire-resistant species (R1-R5), mixed species (M1-M5), and fire-susceptible species (A1-A5) are shown. Grey dotted line marks fire year.

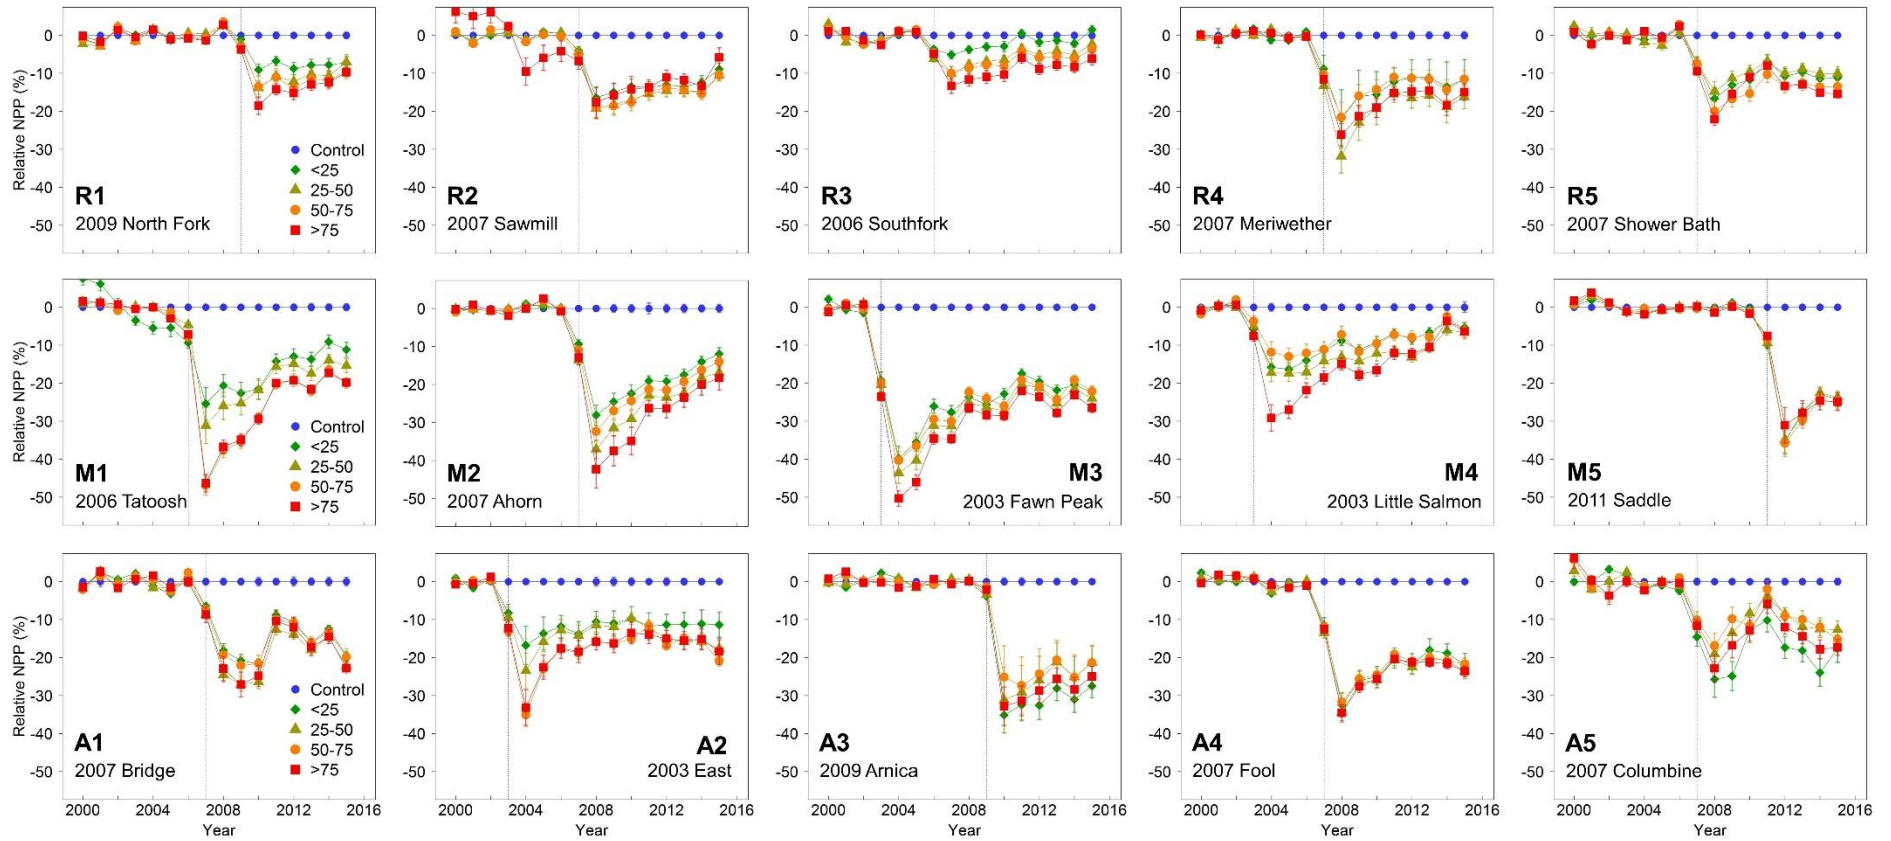

**Supplemental Figure 4.** Mean FRP dose impacts on NPP response (mean  $\pm$  SE) observed in forest stands dominated with species across the fire resistance continuum. Forests dominated by fire-resistant species (R1-R5), mixed species (M1-M5), and fire-susceptible species (A1-A5) are shown. Grey dotted line marks fire year.

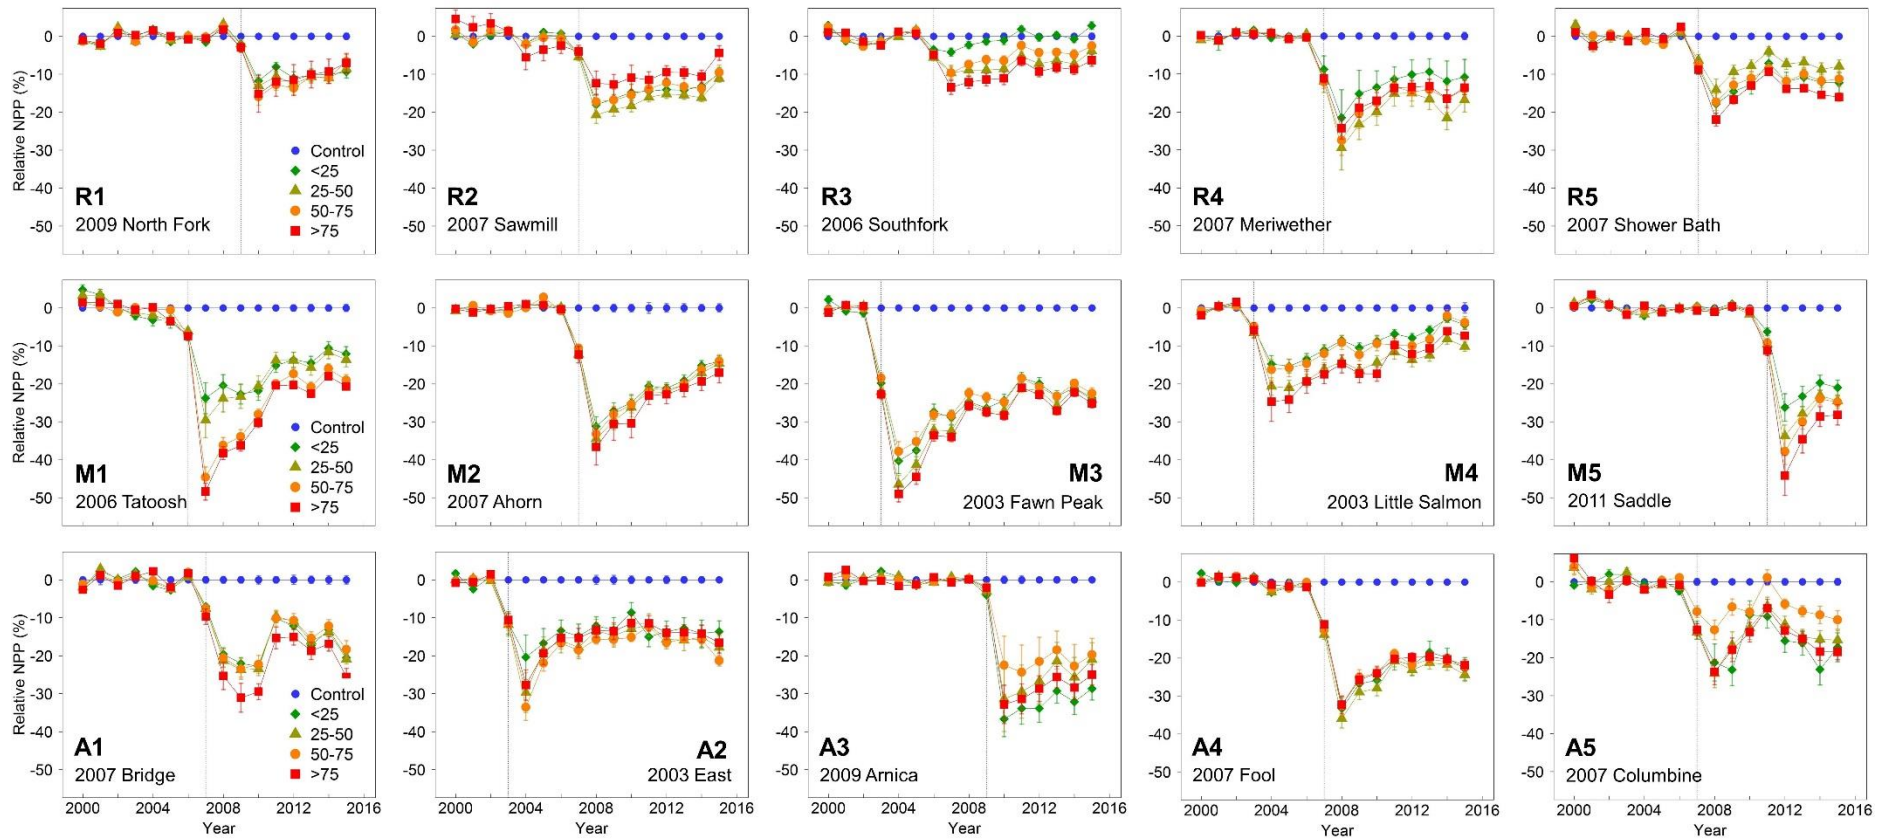

Supplement: Supplementary file 1 [file bg-15-1173-2018-supplement.pdf]
